# Supplementary material
Source: HighWire-hosted journal article supplement (https://svn.bmj.com/content/9/1/18)
Supplement: inline-supplementary-material-1 [file inline-supplementary-material-1.pdf]

**Supplemental Table 1** Clinical characteristics according to onset

|                        | SAH       | VHM       | Tinnitus  | CNP         | Total     |          |
|------------------------|-----------|-----------|-----------|-------------|-----------|----------|
| No. of patients        | 103(52.0) | 90(45.5)  | 3(1.5)    | 2(1.0)      | 198       |          |
| No. of lesions         | 113(54.3) | 90(43.3)  | 3(1.4)    | 2(1.0)      | 208       |          |
| Male sex               | 82(79.6)  | 79(87.8)  | 3(100.0)  | 2(100.0)    | 166(83.8) |          |
| Median age (IQR)       | 52(46-60) | 59(51-65) | 46(43-61) | 58.5(58-59) | 56(47-62) |          |
| Steroid administration | 0(0.0)    | 24(26.7)  | 0(0.0)    | 0(0.0)      | 24(12.1)  |          |
| Hunt and Hess grade    |           |           |           |             |           |          |
|                        | 1         | 29(28.1)  | -         | -           | -         | 29(28.1) |
|                        | 2         | 53(51.5)  | -         | -           | -         | 53(51.5) |
|                        | 3         | 17(16.5)  | -         | -           | -         | 17(16.5) |
|                        | 4         | 3(2.9)    | -         | -           | -         | 3(2.9)   |
|                        | 5         | 1(1.0)    | -         | -           | -         | 1(1.0)   |
| Pre-treatment mRS      |           |           |           |             |           |          |
|                        | 1         | 27(26.2)  | 24(26.7)  | 2(66.7)     | 2(100.0)  | 55(27.8) |
|                        | 2         | 41(39.8)  | 22(24.4)  | 1(33.3)     | 0(0.0)    | 64(32.3) |
|                        | 3         | 13(12.6)  | 11(12.2)  | 0(0.0)      | 0(0.0)    | 24(12.1) |
|                        | 4         | 7(6.8)    | 15(16.7)  | 0(0.0)      | 0(0.0)    | 22(11.1) |
|                        | 5         | 15(14.6)  | 18(20.0)  | 0(0.0)      | 0(0.0)    | 33(16.7) |

CNP: cranial nerve paralysis.

Values are shown as the number (%) of patients or lesions unless indicated otherwise.
