# Supplementary material
Source: HighWire-hosted journal article supplement (https://svn.bmj.com/content/9/1/18)
Supplement: inline-supplementary-material-2 [file inline-supplementary-material-2.pdf]

**Supplemental Table 2** Angioarchitecture according to onset

|                                  |                             | SAH       | VHM      | Tinnitus | CNP      | Total     |
|----------------------------------|-----------------------------|-----------|----------|----------|----------|-----------|
| No. of patients                  |                             | 103(52.0) | 90(45.5) | 3(1.5)   | 2(1.0)   | 198       |
| No. of lesions                   |                             | 113(54.3) | 90(43.3) | 3(1.4)   | 2(1.0)   | 208       |
| AVF types                        |                             |           |          |          |          |           |
|                                  | PVAVF                       | 1(0.9)    | 1(1.1)   | 1(33.3)  | 0(0.0)   | 3(1.4)    |
|                                  | EDAVF                       | 14(12.4)  | 4(4.4)   | 0(0.0)   | 1(50.0)  | 19(9.1)   |
|                                  | PAVF                        | 13(11.5)  | 2(2.2)   | 0(0.0)   | 0(0.0)   | 15(7.2)   |
|                                  | RAVF                        | 29(25.7)  | 10(11.1) | 0(0.0)   | 0(0.0)   | 39(18.8)  |
|                                  | DAVF                        | 56(49.6)  | 73(81.1) | 2(66.7)  | 1(50.0)  | 132(63.5) |
| Side                             |                             |           |          |          |          |           |
|                                  | Left                        | 50(44.2)  | 43(47.8) | 0(0.0)   | 2(100.0) | 95(45.7)  |
|                                  | Right                       | 61(54.0)  | 43(47.8) | 3(100.0) | 0(0.0)   | 107(51.4) |
|                                  | Both                        | 2(1.8)    | 4(4.2)   | 0(0.0)   | 0(0.0)   | 6(2.9)    |
| Fistula location                 |                             |           |          |          |          |           |
|                                  | FM                          | 6(5.3)    | 15(16.7) | 1(33.3)  | 0(0.0)   | 22(10.6)  |
|                                  | C-1                         | 78(69.0)  | 63(70.0) | 1(33.3)  | 1(50.0)  | 143(68.7) |
|                                  | C-2                         | 29(25.7)  | 12(13.3) | 1(33.3)  | 1(50.0)  | 43(20.7)  |
| Arterial feeders                 |                             |           |          |          |          |           |
|                                  | DBVA                        | 64(62.1)  | 70(77.8) | 3(100.0) | 2(100.0) | 139(70.2) |
|                                  | RA                          | 28(27.2)  | 10(11.1) | 0(0.0)   | 0(0.0)   | 38(19.2)  |
|                                  | ASA                         | 27(26.2)  | 5(5.6)   | 0(0.0)   | 0(0.0)   | 32(16.2)  |
|                                  | LSA                         | 16(15.5)  | 4(4.4)   | 0(0.0)   | 0(0.0)   | 20(10.1)  |
|                                  | PICA                        | 3(2.9)    | 2(2.2)   | 0(0.0)   | 0(0.0)   | 5(2.5)    |
|                                  | APA                         | 6(5.8)    | 14(15.6) | 1(33.3)  | 1(50.0)  | 22(11.1)  |
|                                  | OA                          | 2(1.9)    | 6(6.7)   | 1(33.3)  | 0(0.0)   | 9(4.5)    |
|                                  | PMA                         | 4(3.9)    | 1(1.1)   | 0(0.0)   | 0(0.0)   | 5(2.5)    |
|                                  | MMA                         | 0(0.0)    | 1(1.1)   | 0(0.0)   | 0(0.0)   | 1(0.5)    |
| Direction of the venous drainage |                             |           |          |          |          |           |
|                                  | Ascending intradural        | 69(61.1)  | 6(6.7)   | 1(33.3)  | 0(0.0)   | 77(36.5)  |
|                                  | Descending intradural       | 14(12.4)  | 70(77.8) | 1(33.3)  | 0(0.0)   | 87(40.9)  |
|                                  | Bidirectional intradural    | 14(12.4)  | 10(11.1) | 0(0.0)   | 1(50.0)  | 23(12.0)  |
|                                  | Epidural                    | 16(14.2)  | 2(2.2)   | 0(0.0)   | 1(50.0)  | 18(9.1)   |
|                                  | Paravertebral venous plexus | 0(0.0)    | 2(2.2)   | 1(33.3)  | 0(0.0)   | 3(1.4)    |
| Aneurysmal structure             |                             | 47(45.6)  | 13(14.4) | 0(0.0)   | 0(0.0)   | 60(30.3)  |
| Varix                            |                             | 66(64.1)  | 66(73.3) | 2(66.7)  | 1(50.0)  | 135(68.2) |

CNP: cranial nerve paralysis; FM: foramen magnum; C: cervical.

Values are shown as the number (%) of patients or lesions unless indicated otherwise.
