# Supplementary material
Source: HighWire-hosted journal article supplement (https://svn.bmj.com/content/9/1/18)
Supplement: inline-supplementary-material-3 [file inline-supplementary-material-3.pdf]

**Supplemental Table 3** Treatment and outcome according to onset

|                                   | SAH       | VHM      | Tinnitus | CNP      | Total     |
|-----------------------------------|-----------|----------|----------|----------|-----------|
| No. of patients                   | 103(52.0) | 90(45.5) | 3(1.5)   | 2(1.0)   | 198       |
| No. of lesions                    | 113(54.3) | 90(43.3) | 3(1.4)   | 2(1.0)   | 208       |
| <b>Treatment</b>                  |           |          |          |          |           |
| Conservative                      | 3(2.9)    | 1(1.1)   | 1(33.3)  | 0(0.0)   | 5(2.5)    |
| Surgery                           | 76(73.8)  | 73(81.1) | 0(0.0)   | 2(100.0) | 151(76.3) |
| Embolization                      | 6(5.8)    | 7(7.8)   | 2(66.7)  | 0(0.0)   | 15(7.6)   |
| Embolization+Surgery              | 18(17.5)  | 9(10.0)  | 0(0.0)   | 0(0.0)   | 27(13.6)  |
| <b>Complications</b>              |           |          |          |          |           |
| Intracranial infection            | 13(12.6)  | 4(4.4)   | 0(0.0)   | 0(0.0)   | 17(8.6)   |
| Pulmonary infection               | 1(1.0)    | 2(2.2)   | 0(0.0)   | 0(0.0)   | 3(1.5)    |
| CSF leak                          | 0(0.0)    | 4(4.4)   | 0(0.0)   | 0(0.0)   | 4(2.0)    |
| VA occlusion                      | 0(0.0)    | 2(2.2)   | 0(0.0)   | 0(0.0)   | 2(1.0)    |
| Abortion                          | 1(1.0)    | 0(0.0)   | 0(0.0)   | 0(0.0)   | 1(0.5)    |
| Hydrocephalus                     | 1(1.0)    | 0(0.0)   | 0(0.0)   | 0(0.0)   | 1(0.5)    |
| Spinal infarction                 | 1(1.0)    | 0(0.0)   | 0(0.0)   | 0(0.0)   | 1(0.5)    |
| Cerebral infarction               | 1(1.0)    | 0(0.0)   | 0(0.0)   | 0(0.0)   | 1(0.5)    |
| Myocardial infarction             | 1(1.0)    | 0(0.0)   | 0(0.0)   | 0(0.0)   | 1(0.5)    |
| Transient medulla oblongata edema | 0(0.0)    | 1(1.1)   | 0(0.0)   | 0(0.0)   | 1(0.5)    |
| CNP                               | 1(1.0)    | 0(0.0)   | 0(0.0)   | 0(0.0)   | 1(0.5)    |
| DVT of lower limb                 | 0(0.0)    | 1(1.1)   | 0(0.0)   | 0(0.0)   | 1(0.5)    |
| <b>Recurrence</b>                 |           |          |          |          |           |
|                                   | 3(2.9)    | 5(4.4)   | 0(0.0)   | 0(0.0)   | 8(4.0)    |
| <b>Post-treatment mRS*</b>        |           |          |          |          |           |
| 0                                 | 49(47.6)  | 14(15.6) | 1(33.3)  | 1(50.0)  | 65(32.8)  |
| 1                                 | 46(44.7)  | 30(33.3) | 2(66.7)  | 1(50.0)  | 79(39.9)  |
| 2                                 | 1(1.0)    | 10(11.1) | 0(0.0)   | 0(0.0)   | 11(5.6)   |
| 3                                 | 1(1.0)    | 12(13.3) | 0(0.0)   | 0(0.0)   | 13(6.6)   |
| 4                                 | 3(2.9)    | 11(12.2) | 0(0.0)   | 0(0.0)   | 14(7.1)   |
| 5                                 | 0(0.0)    | 5(5.6)   | 0(0.0)   | 0(0.0)   | 5(2.5)    |
| 6                                 | 3(2.9)    | 8(8.9)   | 0(0.0)   | 0(0.0)   | 11(5.6)   |

CSF: cerebrospinal fluid; CNP: cranial nerve paralysis; DVT: deep vein thrombosis;

FM: foramen magnum; C: cervical.

Values are shown as the number (%) of patients or lesions unless indicated otherwise.

\* Post-treatment mRS was evaluated according to the last follow-up.
